# Supplementary material for: The Probiotic Bacillus subtilis MB40 Improves Immunity in a Porcine Model of Listeriosis
Source: MDPI journal article supplement (doi:10.3390/microorganisms11082110), 2023-08-18
Supplement: s1 [file s1]

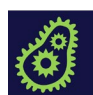

## Supplementary Material

# The Probiotic *Bacillus subtilis* MB40 Improves Immunity in a Porcine Model of Listeriosis

Sean M. Garvey <sup>1</sup>, Nima K. Emami <sup>2</sup>, Justin L. Guice <sup>1</sup>, Nammalwar Sriranganathan <sup>3</sup>, Christopher Penet <sup>1</sup>, Robert P. Rhoads <sup>2</sup>, Jessica L. Spears <sup>4,\*</sup>, Rami A. Dalloul <sup>5</sup>, and Samer W. El-Kadi <sup>2,\*</sup>

<sup>1</sup> Department of Research and Development, BIO-CAT, Inc., Troy, VA 22974, USA

<sup>2</sup> School of Animal Sciences, Virginia Tech, Blacksburg, VA 24061, USA

<sup>3</sup> Department of Biomedical Sciences and Pathobiology, Virginia Tech, Blacksburg, VA 24061, USA

<sup>4</sup> Department of Research and Development, BIO-CAT Microbials, LLC, Shakopee, MN 55379, USA

<sup>5</sup> Department of Poultry Science, University of Georgia, Athens, GA 30602, USA

\* Correspondence: jspears@bio-cat.com (J.L.S.); elkadi@vt.edu (S.W.E.-K.)

**Table S1.** Effects of MB40 supplementation and *Listeria* challenge on plasma biochemistry. <sup>1</sup>

| Parameter (Unit)        | Condition                 |                          |                           |                          | p Value      |              |       |
|-------------------------|---------------------------|--------------------------|---------------------------|--------------------------|--------------|--------------|-------|
|                         | Basal                     | Basal + LM               | MB40                      | MB40 + LM                | Diet         | Challenge    | D × C |
| Glucose (mg/dL)         |                           |                          |                           |                          |              |              |       |
| d1                      | 117.3 ± 15.9              | 113.5 ± 9.3              | 123.6 ± 9.7               | 119.5 ± 11.0             | 0.159        | 0.366        | 0.970 |
| d8 †                    | 115.1 ± 12.7 <sup>a</sup> | 117.9 ± 6.2 <sup>a</sup> | 123.3 ± 12.0 <sup>b</sup> | 124.4 ± 5.1 <sup>b</sup> | <b>0.046</b> | 0.580        | 0.824 |
| d15                     | 125.6 ± 24.0              | 118.1 ± 11.7             | 120.9 ± 9.3               | 133.3 ± 19.9             | 0.403        | 0.693        | 0.115 |
| Urea nitrogen (mg/dL) ‡ |                           |                          |                           |                          |              |              |       |
| d1 ‡                    | 14.8 ± 4.06 <sup>A</sup>  | 12.1 ± 1.81 <sup>B</sup> | 14.5 ± 2.07 <sup>A</sup>  | 12.9 ± 3.04 <sup>B</sup> | 0.808        | <b>0.047</b> | 0.628 |
| d8                      | 14.6 ± 2.45               | 12.8 ± 2.12              | 13.5 ± 1.77               | 13.1 ± 2.23              | 0.627        | 0.151        | 0.334 |
| d15                     | 15.0 ± 2.33               | 13.3 ± 2.43              | 14.6 ± 2.77               | 14.1 ± 2.47              | 0.780        | 0.215        | 0.487 |
| Creatinine (mg/dL) *,** |                           |                          |                           |                          |              |              |       |
| d1                      | 0.67 ± 0.14               | 0.62 ± 0.10              | 0.75 ± 0.09               | 0.63 ± 0.12              | 0.256        | 0.057        | 0.470 |
| d8                      | 0.56 ± 0.05               | 0.58 ± 0.11              | 0.62 ± 0.04               | 0.64 ± 0.10              | 0.067        | 0.531        | 0.948 |
| d15                     | 0.60 ± 0.07               | 0.60 ± 0.09              | 0.63 ± 0.04               | 0.61 ± 0.09              | 0.497        | 0.690        | 0.690 |
| Phosphorous (mg/dL) *   |                           |                          |                           |                          |              |              |       |
| d1                      | 7.7 ± 1.00                | 7.9 ± 1.27               | 7.9 ± 1.23                | 7.7 ± 0.62               | 0.947        | 0.869        | 0.621 |
| d8                      | 8.8 ± 0.63                | 8.8 ± 0.91               | 8.5 ± 0.63                | 9.1 ± 0.82               | 0.908        | 0.346        | 0.261 |
| d15                     | 8.9 ± 0.87                | 9.0 ± 0.98               | 9.0 ± 0.44                | 9.2 ± 0.61               | 0.578        | 0.488        | 0.853 |
| Calcium (mg/dL) *       |                           |                          |                           |                          |              |              |       |
| d1                      | 11.1 ± 1.08               | 11.0 ± 1.00              | 10.9 ± 1.15               | 10.7 ± 0.88              | 0.577        | 0.722        | 0.879 |
| d8                      | 10.1 ± 0.45               | 10.4 ± 0.44              | 10.3 ± 0.54               | 10.3 ± 0.50              | 0.640        | 0.496        | 0.542 |
| d15                     | 10.5 ± 0.36               | 10.6 ± 0.29              | 10.6 ± 0.71               | 10.6 ± 0.35              | 0.939        | 0.594        | 0.703 |
| Total protein (g/dL)    |                           |                          |                           |                          |              |              |       |
| d1                      | 4.7 ± 0.63                | 4.5 ± 0.44               | 4.8 ± 0.60                | 4.5 ± 0.41               | 0.576        | 0.228        | 0.766 |
| d8                      | 4.1 ± 0.33                | 4.4 ± 0.30               | 4.3 ± 0.38                | 4.2 ± 0.31               | 0.600        | 0.403        | 0.122 |
| d15                     | 4.3 ± 0.20                | 4.5 ± 0.29               | 4.4 ± 0.46                | 4.4 ± 0.36               | 0.877        | 0.643        | 0.283 |
| Albumin (g/dL) *,**     |                           |                          |                           |                          |              |              |       |
| d1                      | 2.7 ± 0.43                | 2.7 ± 0.33               | 2.9 ± 0.39                | 2.6 ± 0.26               | 0.660        | 0.266        | 0.526 |
| d8                      | 2.4 ± 0.46                | 2.6 ± 0.34               | 2.5 ± 0.28                | 2.5 ± 0.40               | 0.889        | 0.431        | 0.609 |
| d15                     | 2.4 ± 0.33                | 2.6 ± 0.33               | 2.5 ± 0.29                | 2.5 ± 0.37               | 0.712        | 0.563        | 0.373 |
| Globulin (g/dL) *       |                           |                          |                           |                          |              |              |       |
| d1                      | 1.9 ± 0.33                | 1.8 ± 0.22               | 2.0 ± 0.41                | 1.9 ± 0.17               | 0.598        | 0.382        | 0.860 |
| d8                      | 1.7 ± 0.22                | 1.8 ± 0.21               | 1.9 ± 0.25                | 1.7 ± 0.19               | 0.521        | 0.999        | 0.155 |
| d15                     | 1.9 ± 0.15                | 1.9 ± 0.20               | 2.0 ± 0.26                | 1.9 ± 0.17               | 0.773        | 0.890        | 0.660 |

|                                     |                           |                           |                           |                           |       |                   |              |
|-------------------------------------|---------------------------|---------------------------|---------------------------|---------------------------|-------|-------------------|--------------|
| Alanine transaminase (U/L) *        |                           |                           |                           |                           |       |                   |              |
| d1 †*                               | 19.9 ± 3.76 <sup>A</sup>  | 19.5 ± 3.66 <sup>B</sup>  | 25.3 ± 5.28 <sup>A</sup>  | 17.8 ± 4.30 <sup>B</sup>  | 0.243 | <b>0.015</b>      | <b>0.027</b> |
| d8                                  | 24.9 ± 5.57               | 24.0 ± 4.81               | 25.3 ± 5.55               | 24.3 ± 5.28               | 0.869 | 0.622             | 0.974        |
| d15                                 | 31.1 ± 4.82               | 30.8 ± 6.76               | 28.4 ± 4.93               | 29.4 ± 6.40               | 0.352 | 0.884             | 0.749        |
| Alkaline phosphatase (U/L) *        |                           |                           |                           |                           |       |                   |              |
| d1                                  | 362 ± 73.4                | 395 ± 77.8                | 390 ± 81.7                | 340 ± 78.7                | 0.626 | 0.762             | 0.145        |
| d8                                  | 314 ± 69.2                | 348 ± 72.3                | 314 ± 70.4                | 312 ± 44.1                | 0.434 | 0.479             | 0.447        |
| d15                                 | 344 ± 64.4                | 340 ± 103.2               | 332 ± 63.2                | 293 ± 44.3                | 0.254 | 0.407             | 0.487        |
| Gamma-glutamyl-transferase (U/L) ** |                           |                           |                           |                           |       |                   |              |
| d1                                  | 28.6 ± 8.77               | 34.6 ± 11.69              | 33.4 ± 8.12               | 29.8 ± 7.48               | 0.985 | 0.717             | 0.148        |
| d8 ‡                                | 27.0 ± 3.70               | 35.0 ± 12.60              | 32.5 ± 5.88               | 25.9 ± 3.76               | 0.867 | 0.050             | <b>0.033</b> |
| d15                                 | 30.7 ± 1.27               | 31.0 ± 1.30               | 35.6 ± 1.28               | 29.8 ± 1.20               | 0.507 | 0.324             | 0.265        |
| Creatine kinase (mg/dL)             |                           |                           |                           |                           |       |                   |              |
| d1 ‡                                | 281 ± 93.3                | 447 ± 330.1               | 468 ± 188.5               | 246 ± 116.0               | 0.931 | 0.716             | <b>0.020</b> |
| d8                                  | 641 ± 489.4               | 885 ± 905.4               | 461 ± 391.3               | 361 ± 207.5               | 0.080 | 0.909             | 0.404        |
| d15 †                               | 469 ± 241.6 <sup>A</sup>  | 694 ± 457.2 <sup>B</sup>  | 591 ± 434.3 <sup>A</sup>  | 1278 ± 687.1 <sup>B</sup> | 0.058 | <b>0.017</b>      | 0.206        |
| Cholesterol (mg/dL)                 |                           |                           |                           |                           |       |                   |              |
| d1                                  | 82.4 ± 20.11              | 76.3 ± 8.61               | 79.8 ± 27.26              | 73.8 ± 13.93              | 0.703 | 0.370             | 0.993        |
| d8                                  | 80.6 ± 17.10              | 80.3 ± 12.37              | 77.0 ± 10.65              | 80.1 ± 7.26               | 0.671 | 0.756             | 0.692        |
| d15                                 | 87.4 ± 13.32              | 86.3 ± 13.55              | 82.9 ± 14.16              | 82.6 ± 11.59              | 0.391 | 0.884             | 0.926        |
| Triglycerides (mg/dL) †, **         |                           |                           |                           |                           |       |                   |              |
| d1 †                                | 55.4 ± 12.66 <sup>A</sup> | 39.4 ± 12.45 <sup>B</sup> | 61.8 ± 21.31 <sup>A</sup> | 36.4 ± 9.58 <sup>B</sup>  | 0.747 | <b>&lt; 0.001</b> | 0.374        |
| d8                                  | 45.0 ± 10.64              | 40.5 ± 8.43               | 36.3 ± 10.95              | 44.5 ± 12.07              | 0.542 | 0.630             | 0.107        |
| d15                                 | 48.0 ± 17.15              | 45.4 ± 10.03              | 46.5 ± 14.64              | 45.8 ± 14.43              | 0.912 | 0.741             | 0.854        |
| Sodium (mEq/L) *                    |                           |                           |                           |                           |       |                   |              |
| d1                                  | 143 ± 2.3                 | 143 ± 2.7                 | 143 ± 3.5                 | 144 ± 2.2                 | 0.964 | 0.782             | 0.741        |
| d8                                  | 141 ± 1.3                 | 141 ± 2.9                 | 142 ± 3.0                 | 142 ± 1.6                 | 0.179 | 0.880             | 0.880        |
| d15                                 | 142 ± 2.3                 | 143 ± 2.5                 | 141 ± 2.6                 | 142 ± 2.2                 | 0.533 | 0.186             | 0.926        |
| Potassium (mEq/L) *                 |                           |                           |                           |                           |       |                   |              |
| d1                                  | 5.1 ± 0.60                | 5.0 ± 0.69                | 4.8 ± 0.77                | 4.5 ± 0.29                | 0.086 | 0.349             | 0.441        |
| d8                                  | 5.6 ± 0.88                | 5.2 ± 0.38                | 5.4 ± 0.89                | 5.4 ± 0.69                | 0.999 | 0.372             | 0.397        |
| d15                                 | 5.5 ± 0.68                | 5.3 ± 0.36                | 5.7 ± 0.72                | 5.4 ± 0.96                | 0.448 | 0.253             | 0.980        |
| Chloride (mEq/L) *                  |                           |                           |                           |                           |       |                   |              |
| d1                                  | 104 ± 4.4                 | 102 ± 3.0                 | 104 ± 4.6                 | 103 ± 1.9                 | 0.666 | 0.317             | 0.666        |
| d8                                  | 103 ± 2.4                 | 102 ± 1.6                 | 102 ± 2.4                 | 101 ± 1.6                 | 0.305 | 0.492             | 0.863        |
| d15                                 | 102 ± 2.2                 | 101 ± 1.4                 | 102 ± 3.0                 | 102 ± 1.6                 | 0.675 | 0.288             | 0.471        |
| Carbon dioxide (mEq/L)              |                           |                           |                           |                           |       |                   |              |
| d1                                  | 26.6 ± 3.54               | 26.8 ± 2.87               | 24.3 ± 3.54               | 26.0 ± 0.76               | 0.140 | 0.370             | 0.436        |
| d8                                  | 25.0 ± 4.66               | 24.8 ± 3.20               | 26.3 ± 3.28               | 25.4 ± 3.29               | 0.475 | 0.667             | 0.811        |
| d15                                 | 24.3 ± 4.20               | 28.0 ± 2.78               | 26.5 ± 3.85               | 26.1 ± 2.80               | 0.880 | 0.179             | 0.104        |
| Anion gap (mEq/L)                   |                           |                           |                           |                           |       |                   |              |
| d1                                  | 19.9 ± 2.97               | 19.4 ± 2.50               | 22.2 ± 3.91               | 18.8 ± 2.24               | 0.426 | 0.074             | 0.190        |
| d8                                  | 19.0 ± 3.02               | 19.2 ± 3.01               | 19.4 ± 2.84               | 20.6 ± 3.39               | 0.395 | 0.525             | 0.625        |
| d15                                 | 20.7 ± 3.64               | 19.3 ± 4.23               | 19.1 ± 1.44               | 19.7 ± 3.12               | 0.646 | 0.732             | 0.389        |

<sup>1</sup> Data are means ± standard deviation ( $n = 6-8$  per group); † main effect of diet; ‡ main effect of LM challenge; \* main effect of time; § diet × LM challenge interaction; \*\* time × LM challenge interaction; significant differences between groups ( $p < 0.05$ , ANOVA) are denoted by unshared letters (diet factor: a, b; challenge factor: A, B); significant  $p$  values are italicized and bolded. Abbreviations: Basal, basal diet; d, day; D × C, diet × challenge interaction; LM, *Listeria monocytogenes* challenge at d8; MB40, MB40-supplemented diet.

**Table S2.** *p* values for the effects of *B. subtilis* MB40 supplementation and *Listeria* challenge on growth parameters. <sup>1</sup>

| Parameter (Unit)     | Diet ×      |           |        |             |       |           |                |
|----------------------|-------------|-----------|--------|-------------|-------|-----------|----------------|
|                      | Challenge × | Diet ×    | Diet × | Challenge × | Diet  | Challenge | Time           |
|                      | Time        | Challenge | Time   | Time        |       |           |                |
| Body weight (kg)     | 0.990       | 0.661     | 0.603  | 0.845       | 0.803 | 0.804     | < <b>0.001</b> |
| Body weight gain(kg) | 0.976       | 0.950     | 0.320  | 0.825       | 0.628 | 0.693     | < <b>0.001</b> |
| ADG (kg)             | 0.856       | 0.951     | 0.220  | 0.650       | 0.627 | 0.696     | < <b>0.001</b> |
| ADFI (kg)            | 0.382       | 0.898     | 0.958  | 0.188       | 0.313 | 0.951     | < <b>0.001</b> |
| FCR (kg/kg)          | 0.737       | 0.629     | 0.077  | 0.949       | 0.246 | 0.561     | 0.094          |

<sup>1</sup> Significant differences for factors ( $p < 0.05$ , three-way repeated measures ANOVA) are italicized and bolded ( $n = 7-8$  per group). Abbreviations: ADG, average daily weight gain; ADFI, average daily feed intake; FCR, feed conversion ratio.

**Table S3.** *p* values for the effects of *B. subtilis* MB40 supplementation and *Listeria* challenge on hematology and plasma cytokines. <sup>1</sup>

| Parameter (Unit)                 | Diet ×      |           |              |             |       |              |                |
|----------------------------------|-------------|-----------|--------------|-------------|-------|--------------|----------------|
|                                  | Challenge × | Diet ×    | Diet ×       | Challenge × | Diet  | Challenge    | Time           |
|                                  | Time        | Challenge | Time         | Time        |       |              |                |
| Erythrocytes (cells/μL)          | 0.564       | 0.389     | 0.790        | 0.431       | 0.945 | 0.988        | <b>0.039</b>   |
| Hemoglobin (g/dL)                | 0.502       | 0.106     | 0.516        | 0.730       | 0.999 | 0.275        | < <b>0.001</b> |
| Hematocrit (%)                   | 0.943       | 0.110     | 0.458        | 0.470       | 0.903 | 0.347        | < <b>0.001</b> |
| Packed cell volume (%)           | 0.831       | 0.303     | 0.387        | 0.085       | 0.504 | 0.923        | <b>0.001</b>   |
| Leukocytes (cells/μL)            | 0.786       | 0.276     | 0.513        | 0.137       | 0.247 | 0.027        | 0.075          |
| Segmented neutrophils (cells/μL) | 0.913       | 0.877     | 0.265        | 0.440       | 0.555 | <b>0.004</b> | <b>0.020</b>   |
| Lymphocytes (cells/μL)           | 0.713       | 0.081     | 0.920        | 0.693       | 0.248 | 0.632        | 0.087          |
| Eosinophils (cells/μL)           | 0.156       | 0.522     | <b>0.032</b> | 0.105       | 0.668 | 0.499        | 0.456          |
| Monocytes (cells/μL)             | 0.298       | 0.806     | <b>0.045</b> | 0.196       | 0.468 | <b>0.009</b> | 0.449          |
| Interleukin-10 (pg/mL)           | 0.607       | 0.218     | 0.841        | 0.605       | 0.739 | 0.584        | <b>0.018</b>   |
| Tumor necrosis factor-α (pg/mL)  | 0.886       | 0.724     | 0.154        | 0.371       | 0.290 | 0.381        | <b>0.023</b>   |
| Interleukin-6 (pg/mL)            | 0.683       | 0.387     | 0.638        | 0.538       | 0.797 | 0.444        | < <b>0.001</b> |

<sup>1</sup> Significant differences for factors ( $p < 0.05$ , three-way repeated measures ANOVA) are italicized and bolded ( $n = 6-8$  per group).

**Table S4.** *p* values for the effects of *B. subtilis* MB40 supplementation and *Listeria* challenge on plasma biochemistry. <sup>1</sup>

| Parameter (Unit)                | Diet ×      |           |        |              |              |           |                |
|---------------------------------|-------------|-----------|--------|--------------|--------------|-----------|----------------|
|                                 | Challenge × | Diet ×    | Diet × | Challenge ×  | Diet         | Challenge | Time           |
|                                 | Time        | Challenge | Time   | Time         |              |           |                |
| Glucose (mg/dL)                 | 0.120       | 0.412     | 0.955  | 0.488        | 0.073        | 0.984     | 0.136          |
| Urea nitrogen (mg/dL)           | 0.040       | 1.515     | 0.337  | 0.862        | <b>0.007</b> | 8.246     | 1.791          |
| Creatinine (mg/dL)              | 0.670       | 0.612     | 0.564  | <b>0.022</b> | 0.124        | 0.338     | <b>0.003</b>   |
| Phosphorous (mg/dL)             | 0.540       | 0.745     | 0.951  | 0.751        | 0.691        | 0.464     | < <b>0.001</b> |
| Calcium (mg/dL)                 | 0.981       | 0.703     | 0.553  | 0.614        | 0.849        | 0.899     | <b>0.001</b>   |
| Total protein (g/dL)            | 0.595       | 0.326     | 0.617  | <b>0.026</b> | 0.692        | 0.843     | < <b>0.001</b> |
| Albumin (g/dL)                  | 0.906       | 0.466     | 0.506  | <b>0.011</b> | 0.929        | 0.929     | < <b>0.001</b> |
| Globulin (g/dL)                 | 0.375       | 0.522     | 0.939  | 0.554        | 0.522        | 0.604     | <b>0.008</b>   |
| Alanine transaminase (U/L)      | 0.243       | 0.528     | 0.848  | 0.272        | 0.511        | 0.336     | < <b>0.001</b> |
| Alkaline phosphatase (U/L)      | 0.550       | 0.233     | 0.798  | 0.302        | 0.338        | 0.834     | < <b>0.001</b> |
| Gamma-glutamyltransferase (U/L) | 0.530       | 0.086     | 0.560  | <b>0.001</b> | 0.875        | 0.659     | 0.083          |
| Creatine kinase (mg/dL)         | 0.370       | 0.578     | 0.160  | 0.182        | 0.833        | 0.086     | 0.058          |
| Cholesterol (mg/dL)             | 0.964       | 0.843     | 0.943  | 0.507        | 0.457        | 0.637     | 0.116          |

---

|                        |       |       |       |                     |       |                     |                          |
|------------------------|-------|-------|-------|---------------------|-------|---------------------|--------------------------|
| Triglycerides (mg/dL)  | 0.217 | 0.810 | 0.824 | <b><i>0.001</i></b> | 0.922 | <b><i>0.039</i></b> | 0.103                    |
| Sodium (mEq/L)         | 0.534 | 0.737 | 0.653 | 0.909               | 0.507 | 0.821               | <b><i>0.014</i></b>      |
| Potassium (mEq/L)      | 0.478 | 0.909 | 0.175 | 0.957               | 0.676 | 0.146               | <b><i>&lt; 0.001</i></b> |
| Chloride (mEq/L)       | 0.846 | 0.834 | 0.399 | 0.743               | 0.741 | 0.134               | <b><i>0.039</i></b>      |
| Carbon dioxide (mEq/L) | 0.207 | 0.488 | 0.288 | 0.369               | 0.845 | 0.361               | 0.548                    |
| Anion gap (mEq/L)      | 0.117 | 0.957 | 0.402 | 0.100               | 0.626 | 0.521               | 0.649                    |

---

<sup>1</sup> Significant differences for factors ( $p < 0.05$ , three-way repeated measures ANOVA) are italicized and bolded ( $n = 6\text{--}8$  per group).
